# Supplementary material for: Application of community phylogenetic approaches to understand gene expression: differential exploration of venom gene space in predatory marine gastropods
Source: PubMed Central journal article supplement (PMC4064522; doi:10.1186/1471-2148-14-123), 2014-06-05

**Table S1. Results of maximum-likelihood estimates of  $\omega$  values for A-superfamily genes of *Conus* species.** Gene sets with and without type III pseudogenes were both used for *C. lividus* and *C. sanguinolentus*; a short sequence (livi\_51) was also excluded for analyses of sequences of *C. lividus*. The null model included one  $\omega$  rate across the whole phylogeny while the alternative model used one  $\omega$  for expressed genes and another one for non-expressed genes. *P*-values were determined by Likelihood Ratio Tests of log-likelihoods of null and alternative models with one degree of freedom.

| <b>Gene Set</b>                           | <b>Model</b>           | <b><math>\omega</math></b>           | <b>Ln(L)</b> | <b><i>P</i>-value</b> |
|-------------------------------------------|------------------------|--------------------------------------|--------------|-----------------------|
| <i>C. diadema</i>                         | Null: One rate         | $\omega = 0.679$                     | -572.480     | 0.073                 |
|                                           | Alternative: Two rates | $\omega_1 = 0.624, \omega_2 = 999$   | -570.874     |                       |
| <i>C. lividus</i>                         | Null: One rate         | $\omega = 1.429$                     | -730.687     | 0.008                 |
|                                           | Alternative: Two rates | $\omega_1 = 1.181, \omega_2 = 999$   | -727.245     |                       |
| <i>C. lividus</i> , no pseudogenes        | Null: One rate         | $\omega = 1.285$                     | -682.324     | 0.008                 |
|                                           | Alternative: Two rates | $\omega_1 = 1.069, \omega_2 = 999$   | -678.802     |                       |
| <i>C. quercinus</i> , no pseudogenes      | Null: One rate         | $\omega = 1.379$                     | -300.619     | 0.428                 |
|                                           | Alternative: Two rates | $\omega_1 = 1.790, \omega_2 = 0.939$ | -300.305     |                       |
| <i>C. sanguinolentus</i>                  | Null: One rate         | $\omega = 1.082$                     | -685.390     | 0.041                 |
|                                           | Alternative: Two rates | $\omega_1 = 0.981, \omega_2 = 999$   | -683.310     |                       |
| <i>C. sanguinolentus</i> , no pseudogenes | Null: One rate         | $\omega = 0.970$                     | -642.142     | 0.032                 |
|                                           | Alternative: Two rates | $\omega_1 = 0.862, \omega_2 = 999$   | -639.839     |                       |

**Figure S1. Relative expression levels of coexpressed orthologs between species and inparalogs within species.** Names of loci recovered from *C. lividus* begin with the letter L, *C. diadema* with D, *C. quercinus* with Q and *C. sanguinolentus* with S; numbers after the first letter correspond to numbers in the sequence labels given in Figure 1.

(A) Relative expression levels of orthologous conotoxin loci coexpressed by two *Conus* species. Dark and light grey bars represent orthologous loci expressed by each species.

(B) Relative expression levels of coexpressed inparalogs (those apparently generated by lineage-specific gene duplications). Dark and light grey bars represent the paralogous genes expressed within individuals of each species.

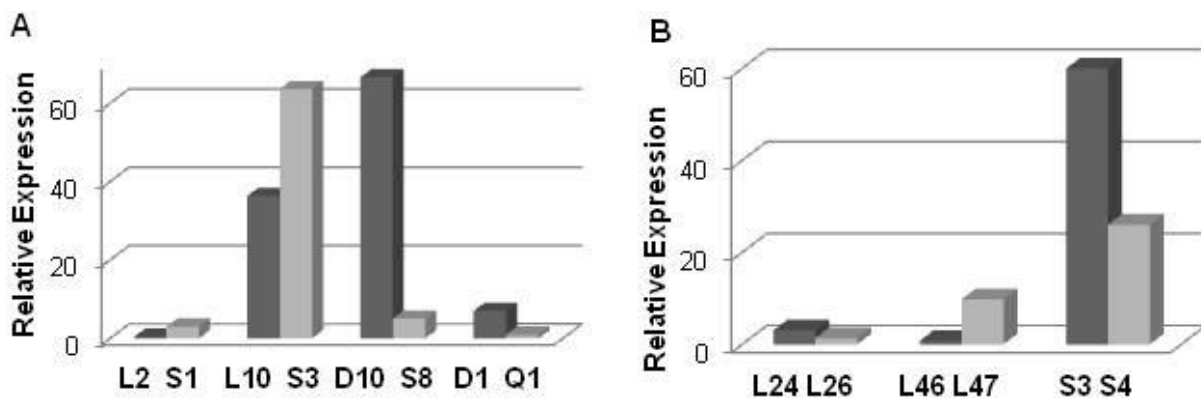

**Figure S2. Boxplots of numbers of synonymous substitutions per synonymous site ( $ds$ , y-axis) against categories of expression (1: neither of the gene pair is expressed; 2: one gene is expressed; 3: both genes are expressed) of four *Conus* species. Sample sizes are labeled next to each category. (A) *C. lividus*, (B) *C. sanguinolentus*, (C) *C. diadema*, and (D) *C. quercinus*.**

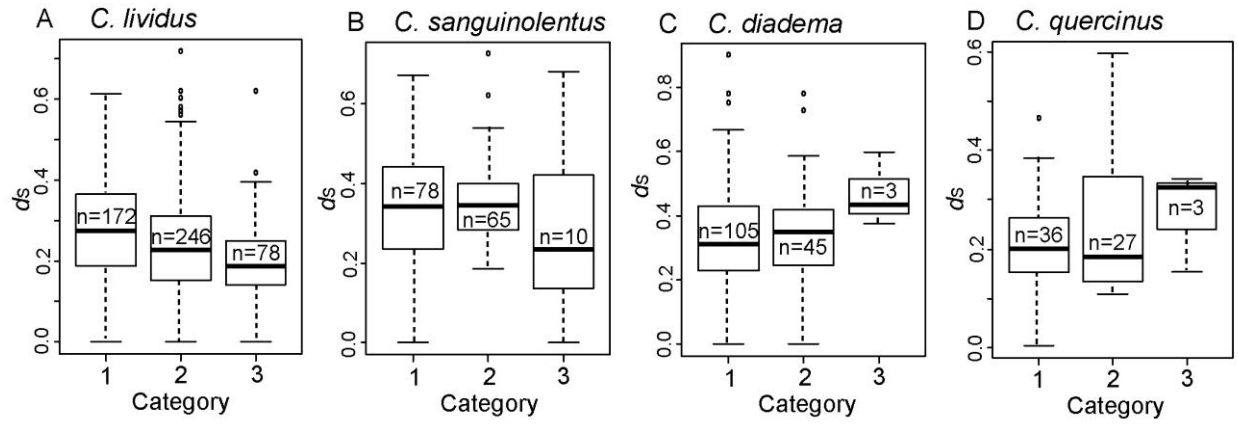

Supplement: 1471-2148-14-123-S3.pdf [file 1471-2148-14-123-S3.pdf]
